1 **White-tailed deer (*Odocoileus virginianus*) may serve as a wildlife reservoir for nearly**  
2 **extinct SARS-CoV-2 variants of concern**

3

4

5 Leonardo C. Caserta<sup>a</sup>, Mathias Martins<sup>a</sup>, Salman L. Butt<sup>a</sup>, Nicholas A. Hollingshead<sup>b</sup>, Lina M.  
6 Covalada<sup>a</sup>, Soheli Ahmed<sup>b</sup>, Mia Everts<sup>a</sup>, Krysten L. Schuler<sup>b</sup>, Diego G. Diel<sup>a</sup>

7

8

9 <sup>a</sup> Department of Population Medicine and Diagnostic Sciences, Animal Health Diagnostic  
10 Center, College of Veterinary Medicine, Cornell University, Ithaca, New York, United States of  
11 America.

12 <sup>b</sup> Department of Public and Ecosystem Health, College of Veterinary Medicine, Cornell  
13 University, Ithaca, New York, United States of America.

14

15

16 Leonardo C. Caserta, Mathias Martins, Salman L. Butt contributed equally to this work.

17

18

19 Address correspondence to: D.G. Diel, e-mail: [dgdiel@cornell.edu](mailto:dgdiel@cornell.edu)

20

21

22 Short title: White-tailed deer may serve as a wildlife reservoir for SARS-CoV-2

23

24

25 **ABSTRACT**

26 The spillover of severe acute respiratory syndrome coronavirus 2 (SARS-CoV-2) from humans  
27 into white-tailed deer (WTD) and its ability to transmit from deer-to-deer raised concerns about  
28 the role of WTD in the epidemiology and ecology of the virus. In the present study, we  
29 conducted a comprehensive investigation to assess the prevalence, genetic diversity, and  
30 evolution of SARS-CoV-2 in WTD in the State of New York (NY). A total of 5,462  
31 retropharyngeal lymph node (RPLN) samples collected from free-ranging hunter-harvested  
32 WTD during the hunting seasons of 2020 (Season 1, September-December 2020, n=2,700) and  
33 2021 (Season 2, September-December 2021, n=2,762) were tested by SARS-CoV-2 real-time  
34 RT-PCR. SARS-CoV-2 RNA was detected in 17 samples (0.6%) from Season 1 and in 583  
35 (21.1%) samples from Season 2. Hotspots of infection were identified in multiple confined  
36 geographic areas of NY. Sequence analysis of SARS-CoV-2 genomes from 164 samples  
37 demonstrated the presence multiple SARS-CoV-2 lineages as well as the co-circulation of three  
38 major variants of concern (VOCs) (Alpha, Gamma, and Delta) in WTD. Our analysis suggests  
39 the occurrence of multiple spillover events (human-to-deer) of the Alpha and Delta lineages with  
40 subsequent deer-to-deer transmission of the viruses. Detection of Alpha and Gamma variants in  
41 WTD long after their broad circulation in humans in NY suggests that WTD may serve as a  
42 wildlife reservoir for VOCs no longer circulating in humans. Thus, implementation of  
43 continuous surveillance programs to monitor SARS-CoV-2 dynamics in WTD are warranted,  
44 and measures to minimize virus transmission between humans and animals are urgently needed.

45

46

47

48 **SIGNIFICANCE**

49 White-tailed deer (WTD) are highly susceptible to severe acute respiratory syndrome  
50 coronavirus 2 (SARS-CoV-2) and are known to efficiently transmit the virus to other susceptible  
51 animals. Evidence of natural exposure or infection of wild WTD in North America raised  
52 significant concerns about their role on the ecology of the virus and its impact on the control of  
53 the coronavirus disease 2019 (COVID-19) pandemic. This comprehensive study demonstrates  
54 widespread infection of SARS-CoV-2 in the WTD populations across the State of New York.  
55 Additionally, we showed co-circulation of three major SARS-CoV-2 variants of concern (VOCs)  
56 in this wildlife population, long after their broad circulation in humans. These findings indicate  
57 that WTD – the most abundant large mammal in North America – may serve as a reservoir for  
58 variant SARS-CoV-2 strains that no longer circulate in the human population.

59

60 **KEYWORDS**

61 One health, white-tailed deer, free-ranging deer, wildlife reservoir, viral reservoir, spillover,  
62 SARS-CoV-2, COVID-19.

63

64

65

66

67

68

69

70

## 71 INTRODUCTION

72           The coronavirus disease 2019 (COVID-19) was declared a pandemic in March of 2020,  
73 and as of August 2022 has incurred over 590 million human cases and more than 6.4 million  
74 deaths globally (1). COVID-19 is caused by severe acute respiratory syndrome coronavirus 2  
75 (SARS-CoV-2), a new zoonotic virus for which most of the first known human infections were  
76 linked to the Huanan Seafood Wholesale market in Wuhan, China, where several live wild  
77 animal species were sold (2). SARS-CoV-2 is a single-stranded RNA virus within the  
78 *Sarbecovirus* subgenus, *Betacoronavirus* genus, of the family *Coronaviridae* (3). Analysis of the  
79 genome sequence of SARS-CoV-2 revealed high similarity to coronaviruses circulating in bats in  
80 China, suggesting that bats are the most likely source of the ancestral virus that originated  
81 SARS-CoV-2 (4). While the closest bat coronaviruses (RaTG13, RmYN02, RpYN06 and PrC31)  
82 are phylogenetically related to SARS-CoV-2, they present several mutations across the genome  
83 that distinguish them from SARS-CoV-2 indicating that direct transmission of the virus from  
84 bats to humans was unlikely (4, 5). These observations point to the involvement of a yet  
85 unidentified animal species that served as an intermediate host and enabled spillover of the virus  
86 into humans (6).

87           Comparative sequence analyses of the main cellular receptor for SARS-CoV-2, the  
88 angiotensin converting enzyme 2 (ACE2), from more than 400 animal species suggested a broad  
89 host range for the virus (7). Notably, the ACE2 of three species of deer, including reindeer  
90 (*Rangifer tarandus*), Père David's deer (*Elaphurus davidianus*) and white-tailed deer - WTD  
91 (*Odocoileus virginianus*) share a high similarity to the human ACE2 and were predicted to allow  
92 binding and entry of SARS-CoV-2 into deer cells (7). We and others have confirmed these *in*

93 *silico* predictions and demonstrated that WTD are highly susceptible to SARS-CoV-2 infection  
94 (8, 9). Most importantly, intranasal inoculation of SARS-CoV-2 in WTD resulted in virus  
95 replication and shedding, which led to efficient deer-to-deer transmission of the virus (8–10).  
96 These findings placed WTD - a species broadly distributed in North America with an estimated  
97 population size of 30 million animals (11) – at the center of investigations which demonstrated  
98 exposure of free ranging WTD to SARS-CoV-2 and highlighted their potential to serve as a  
99 reservoir for SARS-CoV-2 in North America. Notably, results from the first studies revealed  
100 prevalence rates varying from ~30-40%, with animals testing positive for SARS-CoV-2  
101 antibodies and/or viral RNA (12–17). Importantly, detection of SARS-CoV-2 RNA in  
102 respiratory secretions and tissues from several of the sampled animals, suggested recent infection  
103 with the virus (12–15, 17). Additionally, analysis of SARS-CoV-2 sequences recovered from  
104 WTD revealed multiple introductions from humans and suggested onward transmission of the  
105 virus in free-ranging deer populations (12–15). The pathways of human-to-deer transmission of  
106 SARS-CoV-2, however, are not yet understood. These findings highlight the need to establish  
107 surveillance programs that will allow continuous monitoring of the circulation, distribution, and  
108 evolution of SARS-CoV-2 in WTD populations.

109 In this study, we conducted a comprehensive investigation to assess the prevalence,  
110 genetic diversity, and evolution of SARS-CoV-2 in WTD in New York (NY) State. All samples  
111 included in our study (n = 5462) consisted of retropharyngeal lymph nodes (RPLN) – one of the  
112 major sites of SARS-CoV-2 replication in WTD (10) – that were collected as part of the New  
113 York State’s Chronic Wasting Disease (CWD) Surveillance program during two hunting/CWD  
114 testing seasons (Season 1, 2020; and Season 2, 2021).

## 115 **RESULTS**

## 116 **Prevalence of SARS-CoV-2 infection in white-tailed deer in New York**

117 A total of 5,462 RPLN samples collected as part of the New York State's CWD  
118 Surveillance program from wild hunter-harvested WTD during the hunting seasons of 2020  
119 (Season 1, September 2020 through December 2020) and 2021 (Season 2, July of 2021 through  
120 December 2021) were tested for SARS-CoV-2 by real-time RT-PCR. In Season 1, positive  
121 samples were detected in October and November 2020, whereas in Season 2 positive cases were  
122 detected between October and December 2021, with peak positivity being detected between  
123 November 1 and 15, 2021 (Fig. 1A). SARS-CoV-2 RNA was detected in 17 of 2,700 (0.6%)  
124 samples from Season 1 and in 583 of 2,762 (21.1%) samples collected on Season 2 (Fig. 1B).  
125 Viral RNA loads, based on RT-PCR cycle threshold values (Cts), varied slightly between the  
126 seasons (mean Ct values for Season 1 was  $29.8 \pm 3.4$  [mean  $\pm$  SD, range from 24 to 37], whereas  
127 for Season 2 mean Ct was  $30.8 \pm 3.4$  [range from 21 to 37]) (Fig. 1C), however, no statistical  
128 differences were observed in Ct values between the two Seasons ( $p > 0.2$ ). All RPLN samples  
129 with Ct values lower than 30 (11 samples from Season 1, and 205 samples from Season 2), were  
130 subjected to virus isolation in Vero-E6 TMRSS2 cells (10, 18). Infectious virus was recovered  
131 from seven samples collected in Season 2 (Fig. 1D). Together, these results showed a significant  
132 increase (35-fold, chi-square = 585.5,  $P < 0.0001$ ) in the prevalence of SARS-CoV-2 infection  
133 between the 2020 and 2021 seasons and demonstrate a broad circulation of the virus in WTD in  
134 NY.

## 135 **Hotspots of SARS-CoV-2 infection among white-tailed deer in the State of New York**

136 The samples tested in our study were collected statewide from WTD harvested in 57 of  
137 62 counties in New York. The geographic distribution of the samples from Season 1 and Season  
138 2 and those that tested positive for SARS-CoV-2 is presented in Fig. 2A. In Season 1, 17 positive

139 samples were detected in ten of the 62 counties in the state including Orleans (n = 1) and Monroe  
140 County (n = 2) in the Finger Lakes region, Steuben (n = 4) and Chemung County (n = 1) in the  
141 Southern Tier, Delaware (n = 1), Sullivan (n = 3) and Ulster (n = 2) in the Hudson Valley  
142 Region, Columbia (n = 1) and Greene County (n = 1) in the Capital Region, and Clinton County  
143 (n = 1) in the North Country (Fig. 2A). In Season 2, the increased prevalence of SARS-CoV-2  
144 infection in WTD was accompanied by a marked increase in the geographic distribution of the  
145 virus with positive cases being detected in 48 counties (Fig. 2A and B). The proportion of  
146 positive samples detected in each county is presented in Fig. 2B. Positive SARS-CoV-2 cases  
147 were detected in nine of ten geographic regions of the state (Western New York, Finger Lakes,  
148 Southern Tier, Central New York, North Country, Mohawk Valley, Capital Region, Mid-  
149 Hudson, and Long Island) (Fig. 2A). No samples were collected in New York City. The counties  
150 with the highest number of cases were Allegany (n = 72), Cattaraugus (n = 32), and Steuben (n =  
151 31) in the Southern Tier region, Chautauqua (n = 62) in Western New York region, and Orange  
152 (n = 32) and Sullivan (n = 44) in the Hudson Valley region. Together these counties accounted  
153 for 47% of the cases detected across the state (n = 273). A summary of the samples tested, and  
154 SARS-CoV-2 positivity detected by county is presented in Table S1.

155 To identify high-risk areas or hotspots of SARS-CoV-2 infection in WTD in New York,  
156 spatial cluster analysis was performed with the samples from Season 2. This analysis included all  
157 2,762 samples tested in Season 2 and relied on a likelihood ratio test and explored the maximum  
158 number of positive SARS-CoV-2 cases that were detected in a given geographic location.  
159 Nineteen spatial clusters (C1 - C19) containing 3 to 57 positive samples were identified (Table  
160 S2). These SARS-CoV-2 positive WTD clusters comprised samples collected within a radius of  
161 10.6 to 80 kilometers (Km) from each other (Table S2). Among the 19 clusters identified, seven

162 hotspots with high-risk for SARS-CoV-2 infection in WTD (relative risk [RR] > 1.76) were  
163 detected (Fig. 2C; Table S2), most of them (C2, C7, C13 and C18) in the Southern Tier region of  
164 NY. One cluster (C12, RR = 1.76) was formed by samples collected in Chautauqua Western  
165 New York Region and a small cluster (C8, RR = 3.38) in the North Country regions of the state,  
166 respectively (Fig. 2C). From the Southern Tier clusters, Cluster 2 (RR = 2.7) involved two  
167 counties (Allegany and Cattaraugus), Clusters 13 (RR = 2.85), Cluster 7 (RR = 2.63) and Cluster  
168 18 (RR = 2.74) comprised one county each. The larger cluster identified in our analysis, Cluster  
169 1 at Hudson Valley (n = 89 cases) involved three counties (Sullivan, Orange, and Ulster). These  
170 results revealed several hotspots of SARS-CoV-2 infection in WTD in NY, most of which  
171 overlap with geographic areas with the highest deer population densities and deer harvest rates in  
172 the state.

### 173 **Male white-tailed deer are at a higher risk of infection with SARS-CoV-2**

174 The distribution of positive SARS-CoV-2 cases based on sex and age of the animals  
175 sampled in our study was also investigated. Sex and age of all WTD harvested from Season 1  
176 and Season 2 were determined and all animals were distributed in three age groups as follows: <  
177 1.5 years old (fawns),  $\geq 1.5$  and < 2.5 years old (yearlings), and  $\geq 2.5$  years old (adults). Overall,  
178 the number of males in each age group sampled during Season 1 and Season 2 were slightly higher  
179 than the number of females (Fig. 2D), with the number of males that tested positive for SARS-  
180 CoV-2 in all age groups being 2-3 times higher than the number of females in the corresponding  
181 age group (Fig. 2E). As shown in Fig. 2F the proportion of males that tested positive in all age  
182 groups was also markedly higher than the proportion of positive females detected. Logistic  
183 regression analysis confirmed that males were more likely to test positive for SARS-CoV-2 than  
184 females (OR = 1.952, 95% CI = 1.591 - 2.407), with adult males being more likely to become



185 infected with SARS-CoV-2 than younger yearling males (OR = 1.906, 95% CI = 1.55 - 2.35)  
186 (Table S3). These results suggest that adult male WTD are at a higher risk of infection with  
187 SARS-CoV-2.

### 188 **Co-circulation of multiple SARS-CoV-2 variants of concern in white-tailed deer**

189 To assess the genetic makeup and diversity of SARS-CoV-2 in WTD, we performed  
190 whole genome sequencing on 216 samples (including 11 samples from Season 1 and 205  
191 samples from Season 2) that tested positive for SARS-CoV-2 and presented a RT-PCR Ct value  
192 < 30. Consensus genome sequences of 216 samples were assembled and subjected to SARS-  
193 CoV-2 lineage classification using Pangolin version 4.0.6 (19). Of the 216 samples sequenced,  
194 164 genomes passed the Pangolin QC thresholds for minimum length and maximum N content  
195 (10%) and were used for downstream analyses. A total of nine SARS-CoV-2 genomes were  
196 recovered from samples from Season 1, and 155 from samples from Season 2. The geographic  
197 distribution of the samples from which complete or near complete SARS-CoV-2 genome  
198 sequences were obtained according to the season is presented in Fig. 3A. Nine lineages including  
199 three major variants of concern (VOCs) (Alpha [B.1.1.7], Gamma [B.1.1.28, P.1] and Delta  
200 [B.1.617.2]) were detected in WTD samples in NY. The SARS-CoV-2 sequences recovered in  
201 Season 1 were classified as B.1, B.1.1, B.1.2, B.1.243, B.1.409, B.1.507 and Alpha, whereas in  
202 Season 2, B.1.1, B.1.2, B.1.517, Alpha, Gamma and Delta lineages were detected. The  
203 geographic distribution of these lineages across the state is presented in Fig. 3B. Most of the  
204 samples sequenced in our study were classified within one of the three major VOCs identified  
205 Alpha, Gamma, or Delta. Interestingly, Alpha and Delta variants were detected in several  
206 geographic regions throughout the state, while the samples classified as Gamma (n = 27) formed  
207 a localized cluster in the Southern Tier County of Allegany (Fig. 3B). Notably, there was one

208 sample detected in Season 1 (161392; GISAID EPI\_ISL\_13610582 and GenBank OP006342)  
209 that was classified by Pangolin as B.1.617.2 (Delta), but the lineage for this sample was  
210 unassigned by Scorpio (19). Analysis of the mutation profile of the sample revealed the presence  
211 of only 8 of 20 B.1.617.2 lineage defining mutations (ORF1b, P314L; S, T19R, T478K, and  
212 D614G; ORF7a, T120I; and N D63G, R203M and D377Y), thus a lineage was not assigned to  
213 this sample.

214 Phylogenetic analysis performed with the SARS-CoV-2 sequences revealed three large  
215 clusters corresponding to three SARS-CoV-2 VOCs (Alpha, Gamma, and Delta) identified in the  
216 sampled WTD population (Fig. 3C). Together these results demonstrate the concomitant  
217 circulation of Alpha, Gamma, and Delta VOCs in WTD in NY in 2021.

218 Given that most of the samples that were identified as Alpha, Gamma or Delta variants in  
219 WTD in our study were detected between October and December 2021 (Season 2), we analyzed  
220 the circulation of these VOCs in humans. The number of human SARS-CoV-2 cases per lineage  
221 based on available sequencing information for the State of NY and the US over a time frame  
222 (February 2020 to April 2022) overlapping the WTD sampling performed in this study. This data  
223 clearly shows an overlap in detection of the Delta variant in humans and in WTD in NY and  
224 across the US (Fig. 3D, E and F). Notably, while the Alpha and Gamma variants were circulating  
225 in WTD in NY in November and December 2021 (Fig. 3D), detection of these VOCs in humans  
226 peaked between April and June, 2021, with only sporadic detections after August (Fig. 3E).  
227 Three Alpha sequences were reported in NY in September 2021 based on data available at  
228 GISAID, with a single last detection occurring in February 2022, while the two last Gamma  
229 sequences were detected in October 2021. All these latest Alpha and Gamma detections in  
230 humans in the state occurred in New York City, which was not included in the WTD sampling in

231 this study. Interestingly, the Alpha variant was detected in multiple geographic locations in WTD  
232 across NY, in a time where there is no evidence that the virus was broadly circulating in humans  
233 in the state. The time lapse between the peak of detection of Alpha and Gamma variants in  
234 humans and in WTD, suggest that these variants may have become established in WTD in NY.

### 235 **Phylogenomic analysis of SARS-CoV-2 variants detected in white-tail deer**

236 The phylogenetic relationship of the WTD SARS-CoV-2 samples characterized in our  
237 study (n = 164) were compared to other sequences derived from WTD (n = 159) available in the  
238 EpiCoV database in Global Initiative on Sharing All Influenza Data (GISAID). As of August  
239 2022, most available SARS-CoV-2 sequences in GISAID were classified as B.1-like or Delta  
240 lineages, whereas most sequences obtained in this study were classified as Delta variant lineage,  
241 followed by Alpha and Gamma lineages, respectively. Within each of the major lineages  
242 identified in this study (Alpha, Gamma and Delta), samples obtained from close geographic  
243 locations (e.g. same county, or neighboring counties) formed clusters of closely related SARS-  
244 CoV-2 sequences (Fig. 4). Interestingly, the closest phylogenetic relationship was observed  
245 among the Gamma sequences, with all sequences obtained forming a monophyletic cluster (Fig.  
246 4). Pairwise nucleotide analysis demonstrated that the Gamma lineage sequences share up to  
247 99.99 % similarity. All Gamma sequences were obtained from WTD harvested in 6-25 km from  
248 each other, within Allegany County. Consistent with the broader geographic distribution  
249 throughout state (Fig. 3C), the Alpha and Delta lineage sequences formed multiple smaller  
250 clusters, with the Delta sequences from NY being interspersed with Delta variant clusters  
251 detected in WTD in other states of the US (Fig. 4).

### 252 **Evolution and mutation profile of SARS-CoV-2 in white-tailed deer**

253           The genetic relationship of the WTD SARS-CoV-2 sequences with human SARS-CoV-2  
254 sequences available in GISAID was also investigated. A phylogenetic analysis including all 164  
255 sequences characterized in this study, plus 159 WTD SARS-COV-2 sequences and 3,837 human  
256 SARS-CoV-2 genomes available in GISAID was performed (Fig. 5A). The human sequences  
257 included in our analysis were obtained between March 5, 2020 and January 30, 2022. No direct  
258 links between SARS-CoV-2 sequences detected in WTD and in humans in NY were observed.  
259 Interestingly, WTD sequences from the Alpha (Fig. 5B) and Delta lineages (Fig. 5D) from NY  
260 formed 11 and 27 divergent phylogenetic branches, respectively that were interspersed among  
261 the human sequences included in our analysis. All Gamma WTD sequences detected here formed  
262 a monophyletic group highly divergent from the human derived Gamma lineage sequences (Fig.  
263 5A and C).

264           Phylogenetic analysis of SARS-CoV-2 detected in WTD revealed a high genetic diversity  
265 and marked evolution of the viruses detected in this animal species when compared to human  
266 derived SARS-CoV-2 sequences. The WTD SARS-CoV-2 Alpha and Gamma lineage sequences  
267 presented numerous mutations (~50-80) in comparison to the reference sequence Wuhan-1  
268 (GenBank accession number MN908947.3) (Fig. 5B and C). Analysis of the WTD SARS-CoV-2  
269 Delta lineage sequences revealed similar genetic divergence from the human Delta sequences,  
270 however, the number of mutations accumulated in sequences of this lineage in WTD was lower  
271 (ranged 40-65) than the observed mutations in the Alpha and Gamma sequences (Fig. 5D). The  
272 substitution rate in human SARS-CoV-2 sequences was estimated at 24.4 nucleotide  
273 substitutions per year, whereas in WTD the substitution rates were estimated at 35.3, 36.3 and  
274 26.9 substitutions per year for the Alpha, Gamma and Delta sequences, respectively (Fig. S1).

275 Potential host-adaptive mutations were observed in the Alpha, Gamma and Delta lineages  
276 detected in WTD (Tables S4-7). These are non-defining mutations for their respective lineage or  
277 sub-lineage and present low frequency among human derived SARS-CoV-2 sequences (global  
278 frequency < 0.5%). Mutations in the spike (S) gene are of particular interest due to their potential  
279 to result in evasion of immune response. Among the mutations observed in our dataset, S:Q564L  
280 was detected in 11 out of 27 (40.7 %) Gamma sequences. This mutation is present in only 167  
281 sequences from the complete GISAID database and in only one sequence out of 68,540 Gamma  
282 (as of June 6<sup>th</sup>, 2022). Another mutation in the S gene, S1252F, was detected in nine Alpha  
283 (16.4%) and one B.1 lineage sequences from close geographic locations in NY. Among the  
284 putative host-adaptive mutations observed in the S gene, four occurred in the receptor-binding  
285 domain (RBD): P384S and V445A in one Alpha sequence each, and T323I and Y449H in one  
286 Gamma sequence each. No mutations in the S RBD were detected in Delta sequences. Only the  
287 RBD V445A mutation, detected in three geographically related Alpha lineage sequences,  
288 occurred in more than one sample (6.3%) (Table 4). Other potential host-adaptive mutations  
289 were observed in WTD from different regions of NY or in samples from NY and other states  
290 (Table S4). For example, the S mutation W258C was detected in eight Alpha variant sequences  
291 (27.8%) from WTD from different locations of NY, while S mutation L1203F was detected in  
292 four Alpha and three Delta sequences from NY and one B.1.2 from Iowa (IA). Mutations outside  
293 the S gene were also observed (Table S5). The ORF1a mutation L4111F is a strong candidate for  
294 host-specific adaptation. It was detected in fourteen sequences from NY, including nine Gamma  
295 (33.3%) and six Delta sequences, and in five B.1 sequences from WTD from Canada, and one  
296 Alpha sequence obtained from WTD in Pennsylvania.

297 A homoplasy analysis was performed to identify additional sites with potential strong  
298 host adaptive mutations of the SARS-CoV-2 VOCs in WTD (Table S6). The analysis identified  
299 three mutations (ORF1a:T3150I, S:P25S, and S:T29I) with a consistency index  $< 0.5$ , that  
300 presented a low frequency in human derived sequences. Other mutations were also detected in  
301 WTD from other states and in different lineages (Fig. 6). The mutation in ORF1a:L1853F, was  
302 detected in one B.1 and five Alpha sequences from NY, three B.1.311 and 10 B.1.2 sequences  
303 from IA and one Delta sequence from Maine (ME) and Canada (Fig. 6A). The ORF1a:L4111F  
304 mutation was detected in nine Gamma and one Delta sequences in NY, one Alpha sequence from  
305 Pennsylvania (PA), and five B.1 sequences from Canada (Fig. 6B) This mutation is also among  
306 mutations above 30% frequency in its respective lineage (Table S5). The S mutation T29I was  
307 detected in six Alpha lineage sequences from NY State, one B.1.2 from IA and one Delta  
308 sequence from Kansas (KS) (Fig. 6C). Other homoplastic mutations were also detected here  
309 mostly on ORF1a and represented by the substitution of Leucine or Serine to Phenylalanine (L or  
310 S to F) (Table S6).

### 311 **Dispersal of SARS-CoV-2 variants within hotspots of infection in white-tailed deer in New** 312 **York**

313 The geographic dispersal dynamics of SARS-CoV-2 in high-risk clusters identified using  
314 spatial analysis were investigated. The SARS-CoV-2 sequences obtained from seven high risk  
315 clusters (C1, C2, C7, C8, C12, C13 and C18) were included in our phylogeographic  
316 reconstructions (Fig. 7A). Clusters 7 ( $n = 10$ ) and 18 ( $n = 5$ ) comprised a single SARS-CoV-2  
317 variant which were identified as Alpha and Delta, respectively. Cluster 1 ( $n = 10$ ) contained  
318 sequences identified as Alpha ( $n = 4$ ), Delta ( $n = 4$ ), and B.1.409 ( $n = 1$ ) variants. Cluster C2  
319 contained mostly Gamma ( $n = 27$ ) and one Alpha sequence, while C12 comprised Alpha ( $n = 7$ )

320 and Delta variant (n = 6) sequences and C13 comprised Alpha (n = 4), Delta (n = 2) and a single  
321 B.1.1 (n = 1) variant sequence.

322 For the phylogeographic dispersal analysis, we focused on C2, C7 and C18 as  
323 representative clusters of the three major SARS-CoV-2 lineages identified in our study, Gamma,  
324 Alpha and Delta, respectively. The phylogenetic relationship and dispersal pathways were  
325 inferred based on whole genome sequences, and the town and date of sample collection. This  
326 approach allowed spatial reconstruction of the dispersal history of the viral lineage(s) within  
327 each identified cluster. Cluster 2 was geographically restricted to Allegany County and  
328 comprised all the Gamma variant sequences detected in our study. These sequences formed a  
329 monophyletic branch of closely related sequences (Fig. 7B). Phylogeographic dispersal analysis  
330 of the Gamma sub lineages detected in this cluster revealed an intricate dispersal pathway with  
331 clear connections between the sequences. Analysis of the directionality of dispersion of the  
332 Gamma sequences in C2, point to the samples detected in the town of Cuba as the central focus  
333 from which the virus may have spread to Amity, Wirt, and Bolivar and then to other herds in in  
334 surrounding towns in the area including Friendship, Willing, and Alma (Fig. 7B).

335 The Alpha variant C7 involved the counties of Livingston, Wyoming, and Allegany. A  
336 total of 10 Alpha variant sequences were recovered from samples within this cluster, which were  
337 collected in nine different towns in the region (Dansville, North Dansville, Ossian, Portage, and  
338 Sparta in Livingston County; Burns, Hume and Granger in Allegany County; and Pike in  
339 Wyoming County). These sequences formed a large branch in the phylogenetic tree that formed  
340 two smaller branches of closely related sequences (Fig. 7C). Dispersal analysis of the Alpha  
341 sequences detected in this cluster revealed two potential dispersal pathway(s) with links between  
342 the detected sequences. It appears that the sample detected in Portage may be the central foci in

343 C7 from where the virus may have spread to eastern (Sparta, North Dansville and Ossian) and  
344 western locations (Pike, Hume and Granger) (Fig. 7C).

345 The Delta variant C18 represents the smallest ( $n = 5$ ) of the clusters in which we analyzed  
346 the spatial dispersal of SARS-CoV-2. This cluster was restricted to Tompkins County and  
347 samples were detected in the towns of Ulysses, Ithaca, and Enfield. The Delta sequences  
348 detected in C18 formed a unique branch in the phylogenetic tree with highly related sequences  
349 (Fig. 7D). Phylogeographic dispersal analysis of the Delta sequences detected in this cluster  
350 revealed a clear connection between the sequences with the samples detected in the town of  
351 Ulysses appearing to be the central foci of the cluster which further dispersed into nearby Enfield  
352 and Ithaca (Fig. 7D). The phylogenetic relationship of the SARS-CoV-2 sequences detected in  
353 WTD and their divergence from contemporary samples recovered from humans, demonstrate the  
354 circulation and indicate onward transmission of Alpha, Gamma, and Delta SARS-CoV-2 VOCs  
355 in WTD in NY.

356

## 357 **DISCUSSION**

358 White-tailed deer are highly susceptible to SARS-CoV-2 infection and efficiently  
359 transmit the virus to direct or indirect contact animals as demonstrated by our research group and  
360 collaborators from the National Animal Disease Center (NADC) (8, 10). Follow up testing for  
361 SARS-CoV-2 in captive and free-ranging WTD in different regions of the USA and Canada have  
362 shown that a significant proportion of WTD may have been exposed or infected with SARS-  
363 CoV-2 in North America (12, 14, 15, 17).

364 In the present study, we used samples from a well-established surveillance program for  
365 CWD in wild deer in the State of NY (20), to conduct a comprehensive investigation and assess



366 the prevalence of SARS-CoV-2 infection in WTD over two deer hunting seasons (2020 and  
367 2021) during the COVID-19 pandemic. During these seasons 253,990 and 211,269 WTD were  
368 harvested by hunters in NY, respectively with ~1% of the animals being sampled and tested for  
369 CWD (2,700 and 2,762, respectively) and subsequently included in our study. Of the samples  
370 tested for SARS-CoV-2 17 (0.6%) were positive in 2020 and 583 (21.1%) in 2021. The sampling  
371 strategy used by the NYS Department of Environmental Conservation (NYSDEC) emphasizes  
372 locations and age classes of deer that are at greater risk for CWD infection using weighted  
373 surveillance and a qualitative risk assessment. The sampling calculations are determined by three  
374 primary criteria: i. deer sex and age classes, with emphasis given to older bucks and does; ii.  
375 proximity to geographic risk factors, such as captive cervid facilities, taxidermy and deer  
376 processing centers, and proximity with CWD-endemic states (like PA); and finally, iii. the deer  
377 population size, with areas with larger deer counts (estimated based on the number of deer  
378 harvested by square kilometer) receiving more intense surveillance. This sampling strategy  
379 allowed us to evaluate the infection rate and dynamics of SARS-CoV-2 infection using samples  
380 that are representative of the adult WTD population distributed across the State of NY (~1M  
381 WTD). Our results showed a striking 35-fold increase in SARS-CoV-2 prevalence and  
382 consequently a broader geographic distribution of the infection between 2020 (10/62 positive  
383 counties, Season 1) and 2021 (57/62 positive counties, Season 2).

384 Spatial clustering analysis based on positive SARS-CoV-2 detections revealed several  
385 hotspots or areas with a high concentration of cases in WTD in NYS. Notably, when the viral  
386 sequence information was compared with the spatial clusters, several clusters of closely related  
387 SARS-CoV-2 variants overlapped with these defined geographic hotspots, indicating local  
388 circulation and transmission of the virus within the deer populations in these areas. These

389 findings corroborate observations of early studies which found evidence of potential  
390 transmission of SARS-CoV-2 amongst wild WTD in the states of Ohio and Iowa in the US or in  
391 the province of Ontario in Canada (12, 15, 21). Interestingly, the broad geographic distribution of  
392 the Alpha and Delta SARS-CoV-2 variants in our study and the identification of several clusters  
393 of closely related viruses within confined geographic locations, highlight the occurrence of  
394 multiple viral spillover events from humans to WTD between 2020 and 2021, which was  
395 followed by deer-to-deer transmission of the virus.

396         Transmission of the virus between WTD can occur through direct contact or indirectly,  
397 likely through respiratory droplets (8, 10). While assessing SARS-CoV-2 transmission pathways  
398 within WTD populations, animal age and sex must be considered as direct or indirect contact  
399 between animals can be increased by distinct social behaviors of different age groups and sex.  
400 For example, maternal groups consisting of females and fawns are relatively isolated during the  
401 spring and summer while males typically have large home ranges and have increased movement  
402 and contact with other deer especially during the breeding season (16, 22). Interestingly, results  
403 from our study, in which sample collection overlaps with the breeding season (September to  
404 December), indicate that adult male deer are at significantly higher risk of becoming infected  
405 with SARS-CoV-2 than other sex and age classes. These observation are consistent with a  
406 previous serological study that has shown higher prevalence of antibodies in adult male WTD  
407 (16) and highlight the potential epidemiological role of males in maintenance and transmission  
408 of the virus within wild WTD populations. Although the pathways for transmission of SARS-  
409 CoV-2 from humans-to-WTD remain largely unknown, human activities such as feeding wildlife  
410 or targeted baiting of hunting prey (e.g., WTD) could provide the opportunity for human-to-  
411 WTD transmission of the virus. Animal feed and feed ingredients are known to promote and

412 enhance survival of several animal viruses, including coronaviruses (23), thus wildlife feeding  
413 practices should be investigated as a risk factor and avoided due to their potential to enable  
414 spillover of SARS-CoV-2 from humans to WTD and perhaps other susceptible wildlife species  
415 (e.g. mink, deer mice, raccoon dogs, etc.; Fig. 8) (24–26).

416         In our study, we have not found direct sequence links between the viruses circulating in  
417 WTD in NY with any of the available SARS-CoV-2 sequences recovered from humans. In fact,  
418 the viral sequences obtained from WTD are highly divergent from available human-derived  
419 SARS-CoV-2 sequences, with some strains accumulating over 70 nucleotide mutations across  
420 the genome. High genetic divergence from human SARS-CoV-2 sequences was observed  
421 amongst sequences from all three major (Alpha, Gamma and Delta) variants identified in our  
422 study. Notably, Alpha and Gamma sequences presented the highest divergence to human  
423 sequences, which aligns with the fact that these variants were likely introduced earlier and  
424 circulated longer in WTD populations than Delta variant viruses. The peak of detection of Alpha  
425 and Gamma variants in humans in NY occurred between April and June 2021, with only  
426 sporadic detections occurring after August, while the Delta variant was the dominant variant  
427 circulating in humans in NY during the time of sample collection from WTD included in our  
428 study. These findings indicate independent evolution of SARS-CoV-2 VOCs in WTD and  
429 demonstrate parallel circulation of viral variants (Alpha and Gamma) that had been replaced by  
430 the Delta variant in humans, thus highlighting the potential that WTD may serve as a wildlife  
431 reservoir for nearly extinct SARS-CoV-2 variants. Thus, it is extremely important to continue to  
432 monitor WTD populations in the areas sampled in our study to assess the dynamics of the  
433 identified VOCs as well as of other deer-associated variants that might evolve and emerge in this  
434 host and potentially spillback into humans.

435           To date, only one report described the detection of a single WTD-like SARS-CoV-2  
436 variant recovered from humans in Canada, which suggests potential deer-to-human transmission  
437 of the virus (14). Deer hunting is a widespread practice in North America that is regulated by the  
438 states and used as a method of population control for this highly prolific animal species. In 2020,  
439 for example ~6.5 million WTD were harvested in the US and Canada (27). This practice  
440 provides opportunities for close contact between a potentially infected reservoir and humans,  
441 along with wildlife rehabilitation, captive cervid ownership, and zoological collections. In the  
442 present study, we recovered infectious virus from seven RPLN samples that tested positive for  
443 SARS-CoV-2 RNA, corroborating findings from previous studies that detected infectious virus  
444 in samples collected from wild WTD (12, 15). Although the proportion of live virus positive  
445 samples detected was low, the findings are important in that they demonstrate that there is a risk  
446 of contact with infectious SARS-CoV-2 during handling and processing of WTD carcasses,  
447 which could lead to spillback via deer-to-human transmission of the virus. Our previous  
448 experimental data, assessing the infectious and transmission dynamics of SARS-CoV-2 in WTD,  
449 demonstrated a short window (~5 days) of infectiousness, a period in which experimentally  
450 inoculated animals excrete the virus in oral and nasal secretions and carry infectious/replicating  
451 virus in respiratory and lymphoid tissues and are able to transmit the virus to contact animals  
452 (10). The short viral replication window in tissues may have contributed to the low detection of  
453 infectious virus in the samples tested in our study. Additional factors such as a longer time from  
454 sample collection to testing and sub-optimal sample storage conditions may also have negatively  
455 affected the success of virus isolation in our study.

456           The high number of mutations observed in SARS-CoV-2 samples recovered from WTD  
457 in relation to human samples indicate that the virus has been circulating and evolving within the

458 deer population. Some of the observed mutations could be a response to host adaptation. The  
459 mutation ORF1a:L4111F, for example, is observed in WTD-derived samples from multiple  
460 geographic regions and is present at a low frequency (< 0.5%) among all human sequences  
461 available in GISAID database. This suggests that this mutation emerged independently in deer  
462 after spillover from humans. The absence or very low frequency of fixed mutations in the S gene  
463 suggests that host-specific adaptation was not necessary for human-to-deer spillover, reinforcing  
464 the notion of SARS-CoV-2 as a “generalist” virus (28). The presence of homoplasious and high  
465 frequency mutations in ORF1a and ORF1b emphasize the importance of also characterizing non-  
466 Spike protein mutations, as they may also play a role on virus host-range and species specificity.  
467 A few mutations detected in the S gene lie near aa residues that define the Delta, Alpha and  
468 Gamma VOCs (Table S7). The mutation S:R683W detected in Delta WTD sequences, for  
469 example, is located close to the S:P681R site, which enhances cleavage of the S into the S1 and  
470 S2 subunits (29). Two other substitutions detected in Alpha WTD samples, S:D568N and  
471 S:I569T, lie in close proximity to the S:A570D mutation, which may play an important role  
472 modulating the conformation of S RBD, and was shown to contribute to Alpha VOC infectivity  
473 in humans (30). It is possible that these S substitutions might increase affinity of S protein for the  
474 WTD ACE2 receptor orthologue (31), however additional experiments are needed to determine  
475 their actual biological function and whether they contribute to SARS-CoV-2 infection,  
476 replication and transmission.

477         The evidence generated in this study demonstrate widespread dissemination of SARS-  
478 CoV-2 in wild WTD populations across the State of NY, and further indicate the co-circulation  
479 of three major VOCs in this new wildlife host. Notably, circulation of SARS-CoV-2 in WTD  
480 results in emergence of highly genetically diverse viruses in this species. These observations

481 highlight the need to establish continuous surveillance programs to monitor the circulation,  
482 distribution, and evolution of SARS-CoV-2 in WTD populations and to establish measures to  
483 minimize additional virus introductions in animals that may lead to spillback of novel deer-  
484 adapted SARS-CoV-2 variants to humans.

485

## 486 **MATERIAL AND METHODS**

### 487 **Sample collection**

488         Retropharyngeal lymph nodes (RPLN) from white-tailed deer (WTD) from the Chronic  
489 Wasting Disease (CWD) surveillance program in New York State (NYS) were used in this study  
490 to investigate the presence of SARS-CoV-2. Samples were collected and submitted to Cornell  
491 Animal Health Diagnostic Center (AHDC) for ELISA testing. A total of 5,462 RPLN collected  
492 during the hunting seasons of 2020 (Season 1, September - December 2020, n = 2,700) and 2021  
493 (Season 2, September - December 2021, n = 2,762) were included in this study. The WTD sex,  
494 age, date of harvest, and location to the level of town were collected with the sample to use for  
495 analysis.

### 496 **Nucleic acid extraction and rRT-PCR**

497         RPLN tissues (200 mg) were minced with a sterile scalpel, resuspended (1/10 w/v) in  
498 PBS and homogenized using magnetic beads. For the RNA extraction, 200 µl of the homogenate  
499 was used as input using the MagMax Core extraction kit (Thermo Fisher, Waltham, MA, USA)  
500 and the automated KingFisher Flex nucleic acid extractor (Thermo Fisher, Waltham, MA, USA)  
501 following the manufacturer's recommendations. The real time reverse transcriptase PCR (rRT-  
502 PCR) was performed using the EZ-SARS-CoV-2 real-time RT-PCR assay (Tetracore Inc.,  
503 Rockville, MD), which detects both genomic and sub-genomic viral RNA for increased

504 diagnostic sensitivity. An internal inhibition control was included in all reactions. Positive and  
505 negative amplification controls were run side by side with test samples.

## 506 **Virus isolation**

507 For virus isolation, RPLN that tested positive for SARS-CoV-2 by rRT-PCR with Ct  
508 values lower than 30 were subjected to virus isolation under biosafety level 3 conditions at  
509 Cornell University. Vero E6/TMPRSS2 (JCRB Cell Bank, JCRB1819) were cultured in  
510 Dulbecco's modified eagle medium (DMEM) supplemented with 10% fetal bovine serum (FBS),  
511 L-glutamine (2mM), penicillin (100 U.ml<sup>-1</sup>), streptomycin (100 µg.ml<sup>-1</sup>) and geneticin (1 mg.ml<sup>-1</sup>).  
512 Twenty-four well plates were seeded with ~75,000 Vero E6/TMPRSS2 cells per well 24 h  
513 prior to sample inoculation. Cells were rinsed with phosphate buffered saline (PBS) (Corning)  
514 and inoculated with 200 µl of the homogenate and inoculum adsorbed for 1 h at 37 °C with 5%  
515 CO<sub>2</sub>. Mock-inoculated cells were used as negative controls. After adsorption, replacement cell  
516 culture media was added, and cells were incubated at 37 °C with 5% CO<sub>2</sub> and monitored daily  
517 for cytopathic effect (CPE) for 3 days. SARS-CoV-2 infection in CPE-positive cultures was  
518 confirmed with an immunofluorescence assay (IFA) as described previously (8). Cell cultures  
519 with no CPE were frozen, thawed, and subjected to two additional blind passages/inoculations in  
520 Vero E6/TMPRSS2 cell cultures. At the end of the third passage, the cells cultures were  
521 subjected to IFA.

## 522 **Data acquisition**

523 All WTD derived SARS-CoV-2 genomes (n = 159) were retrieved from GISAID  
524 (accessed May 1, 2022). All human derived SARS-CoV-2 genomes (n = 91,796) from the State  
525 of NY, US were retrieved, and a local BLAST database was built to obtain 3837 sequences with  
526 highest nucleotide similarities to WTD derived SARS-CoV-2 genomes in current study.

## 527 **SARS-CoV-2 genome sequencing**

528 Total RNA was reverse transcribed using SuperScript IV Reverse Transcriptase  
529 (ThermoFisher scientific) as described in the protocol available at [dx.doi](https://dx.doi.org/10.17504/protocols.io.br54m88w)  
530 [.org/10.17504/protocols.io.br54m88w](https://dx.doi.org/10.17504/protocols.io.br54m88w). The cDNA from each sample was used four times for  
531 parallel generation of tiled amplicons with ARTIC V3 and ARTIC V4.1 primers (IDT) and  
532 library preparation using a modified ARTIC network's nCoV-2019 sequencing protocol v2 (32).  
533 Minor modifications include the use of Q5 High-Fidelity 2X Master Mix and the use of 4µl  
534 cDNA in a 25µl PCR reaction. Additionally, the annealing and denaturation temperatures were  
535 dropped to 64 °C and 95 °C, respectively. Purified amplicons were diluted 1:10 and quantified  
536 before used as input for two sequencing library preparations (V3 and V4.1 primers), that were  
537 loaded on R9.4 flow cells in a MinION Mk1B (Oxford Nanopore Technologies, ONT).

## 538 **Genomic analysis**

539 Raw FAST5 reads were basecalled and demultiplexed using Guppy v5.0.16 in high  
540 accuracy mode. The output FASTQ files were processed through the ARTIC bioinformatics  
541 pipeline using the applicable primer scheme (V3 or V4.1) to generate consensus sequences  
542 ([https:// github.com/artic-network/artic-ncov2019](https://github.com/artic-network/artic-ncov2019)). Lineage classification was performed using  
543 Pangolin version 4.0.6 (19). Only sequences passing Pangolin QC thresholds for minimum  
544 length and maximum N content were used for downstream analyses.

## 545 **Interactive phylogenomic and phylogeographic analyses**

546 For phylogenetic analysis of WTD derived SARS-CoV-2 genomes, two curated datasets  
547 were created. First dataset consisted of all 164 SARS-CoV-2 from current study and 159 deer  
548 derived SARS-CoV-2 genomes downloaded from GISAID database. The second dataset  
549 consisted of 3837 human derived SARS-CoV-2 genomes and 323 deer derived SARS-CoV-2



550 genomes from the present study and GISAID database. Phylogenetic analysis on both datasets  
551 was performed by using procedures implemented in Nextstrain (33). Briefly, multiple sequence  
552 alignment was performed using Nextalign, maximum likelihood tree inferred using IQ-TREE  
553 through Augur toolkit, and data visualization through Auspice. Maps in figures 3A and 3B were  
554 generated using Microreact (34).

### 555 **Mutation analysis**

556 Sequences from the present study were grouped according to its VOC classification and  
557 nucleotide sequence alignments were performed individually for each group of VOCs using  
558 MAFFT v7.453 (35). Variations in relation to reference genome (GenBank accession number  
559 MN908947.3) were identified in Geneious Prime 2019 software. Lineage-defining non-  
560 synonymous mutations were obtained from the Lineage Comparison tool of Outbreak web  
561 interface (36) and excluded from the dataset. The remaining mutations were used to screen for  
562 possible host-adaptive mutations. The phylogenetic tree with WTD derived sequences was  
563 screened for homoplasies using HomoplasmyFinder to strengthen findings of putative host-  
564 adaptive mutations (37). Nucleotide positions with a consistency index <0.5 were considered for  
565 further analysis.

### 566 **Time scale distribution of human derived SARS-CoV2**

567 To place the deer derived SARS-CoV-2 VOCs from current study in the context of VOCs  
568 circulating in human population, the epidemiological metadata (VOCs and date of collection) of  
569 a total of 91,000 (NY) and 250,000 (USA) human derived SARS-CoV-2 genome sequences from  
570 February 2020 to May 2022 were retrieved from GISAID. A stacked bar graph showing monthly  
571 cases of different VOCs in human population of NY and USA was created (34) Using GraphPad  
572 prism 9 (GraphPad Software, San Diego, CA, USA)

## 573 **SaTScan spatial analysis Relative Risk and Logistic Regression Analysis**

574 The space-time discrete Bernoulli model (STBM) within SaTScan software version  
575 10.0.2 (<http://www.satscan.org>) (38) was used to identify statistically significant clusters of  
576 SARS-CoV-2 infection in WTD population. For each sample, the geographic location (latitude  
577 and longitude) was determined based on the centroid of town using the US Census Bureau  
578 County TIGER/Line Shapefile for County Subdivisions, which are equivalent to towns, cities  
579 and other similar administrative divisions. To detect high rates of SARS-CoV-2 in deer clusters,  
580 the Monte Carlo hypotheses test method and 999 replications were applied to detect a high  
581 prevalence rate of SARS-CoV-2 (39). The spatial clusters were visualized in QGIS (geographic  
582 information system) mapping software version 3.16.16 (40).

## 583 **Relative Risk and Logistic Regression Analysis**

584 The measure of relative risk (RR) was used to identify locations with a greater risk of  
585 having SARS-CoV-2 in deer, following the equation  $RR = (c/e) / ((C-e)/(C-e))$  where  $c$  represents  
586 the total number of observed cases in the town,  $e$  represents the total number of expected cases in  
587 a town,  $C$  is the total number of observed cases in New York State. If the RR was larger than 1,  
588 the location had a greater risk of having a positive in deer. A logistic regression analysis  
589 conducted on deer outside the clusters was used to determine whether the difference between  
590 deer grouped by age, sex, and season makes sense in the comparison of age, sex, and season for  
591 SARS-CoV-2 infection.

## 592 **Data availability**

593 All SARS-CoV-2 consensus genomes are deposited in GISAID, <https://www.gisaid.org/>;  
594 Accession numbers are available in Table S8 and raw reads have been submitted to NCBI's  
595 Short Read Archive (BioProject Number PRJNA872140).

596 **Acknowledgments**

597 We thank the Cornell Biosafety team for the support. We also thank the Animal Health  
598 Diagnostic Center at Cornell University for the use of extraction and real-time PCR equipment.  
599 The NYS Department of Environmental Conservation was instrumental in tissue collection and  
600 cooperation in data sharing for this study. Tetracore Inc. generously provided the real-time PCR  
601 reagents used to test the samples in this study.

602 **References**

- 603 1. WHO, “COVID-19 Weekly Epidemiological Update” (2021).
- 604 2. C. Huang, *et al.*, Clinical features of patients infected with 2019 novel coronavirus in  
605 Wuhan, China. *Lancet* **395**, 497–506 (2020).
- 606 3. A. E. Gorbalenya, *et al.*, The species Severe acute respiratory syndrome-related  
607 coronavirus: classifying 2019-nCoV and naming it SARS-CoV-2. *Nat. Microbiol.* **5**, 536–  
608 544 (2020).
- 609 4. S. K. P. Lau, *et al.*, Possible Bat Origin of Severe Acute Respiratory Syndrome  
610 Coronavirus 2. *Emerg. Infect. Dis.* **26**, 1542–1547 (2020).
- 611 5. S. Murakami, *et al.*, Detection and Characterization of Bat Sarbecovirus Phylogenetically  
612 Related to SARS-CoV-2, Japan. *Emerg. Infect. Dis.* (2020)  
613 <https://doi.org/10.3201/eid2612.203386>.
- 614 6. K. G. Andersen, A. Rambaut, W. I. Lipkin, E. C. Holmes, R. F. Garry, The proximal  
615 origin of SARS-CoV-2. *Nat. Med.*, 2–4 (2020).
- 616 7. J. Damas, *et al.*, Broad host range of SARS-CoV-2 predicted by comparative and  
617 structural analysis of ACE2 in vertebrates. *Proc. Natl. Acad. Sci. U. S. A.* **117**, 22311–  
618 22322 (2020).

- 619 8. M. V. Palmer, *et al.*, Susceptibility of white-tailed deer ( *Odocoileus virginianus* ) to  
620 SARS-CoV-2 . *J. Virol.* (2021) <https://doi.org/10.1128/jvi.00083-21> (April 2, 2021).
- 621 9. K. Cool, *et al.*, Infection and transmission of ancestral SARS-CoV-2 and its alpha variant  
622 in pregnant white-tailed deer. *Emerg. Microbes Infect.* **11**, 95–112 (2022).
- 623 10. M. Martins, *et al.*, From Deer-to-Deer: SARS-CoV-2 is efficiently transmitted and  
624 presents broad tissue tropism and replication sites in white-tailed deer. *PLOS Pathog.* **18**,  
625 e1010197 (2022).
- 626 11. B. B. Hanberry, Addressing regional relationships between white-tailed deer densities and  
627 land classes. *Ecol. Evol.* **11**, 13570–13578 (2021).
- 628 12. S. V. Kuchipudi, *et al.*, Multiple spillovers from humans and onward transmission of  
629 SARS-CoV-2 in white-tailed deer. *Proc. Natl. Acad. Sci.* **119** (2022).
- 630 13. A. D. Marques, *et al.*, Evolutionary Trajectories of SARS-CoV-2 Alpha and Delta  
631 Variants in White-Tailed Deer in Pennsylvania. *medRxiv*, 2022.02.17.22270679 (2022).
- 632 14. B. Pickering, *et al.*, Highly divergent white-tailed deer SARS-CoV-2 with potential deer-  
633 to-human transmission. *bioRxiv*, 2022.02.22.481551 (2022).
- 634 15. V. L. Hale, *et al.*, SARS-CoV-2 infection in free-ranging white-tailed deer. *Nature* **602**,  
635 481–486 (2022).
- 636 16. P. M. Palermo, J. Orbeago, D. M. Watts, J. C. Morrill, SARS-CoV-2 Neutralizing  
637 Antibodies in White-Tailed Deer from Texas. *Vector-Borne Zoonotic Dis.*  
638 <https://doi.org/10.1089/vbz.2021.0094>.
- 639 17. J. C. Chandler, *et al.*, SARS-CoV-2 exposure in wild white-tailed deer (*Odocoileus*  
640 *virginianus*). *Proc. Natl. Acad. Sci. U. S. A.* **118**, e2114828118 (2021).
- 641 18. S. Matsuyama, *et al.*, Enhanced isolation of SARS-CoV-2 by TMPRSS2- expressing cells.

- 642 *Proc. Natl. Acad. Sci. U. S. A.* (2020) <https://doi.org/10.1073/pnas.2002589117>.
- 643 19. A. Rambaut, *et al.*, A dynamic nomenclature proposal for SARS-CoV-2 lineages to assist  
644 genomic epidemiology. *Nat. Microbiol.* 2020 511 **5**, 1403–1407 (2020).
- 645 20. DEC, No Title. *Chronic Wasting Dis. New York State Dep. Environ. Conserv.* (2022).
- 646 21. B. Pickering, *et al.*, Highly divergent white-tailed deer SARS-CoV-2 with potential deer-  
647 to-human transmission Abstract Wildlife reservoirs of SARS-CoV-2 may enable viral  
648 adaptation and spillback from animals to humans . In North America , there is evidence of  
649 unsustained spill (2022).
- 650 22. D. J. O’Brien, *et al.*, Epidemiology of Mycobacterium bovis in free-ranging white-tailed  
651 deer, Michigan, USA, 1995-2000. *Prev. Vet. Med.* **54**, 47–63 (2002).
- 652 23. S. A. S. A. Dee, *et al.*, Survival of viral pathogens in animal feed ingredients under  
653 transboundary shipping models. *PLoS One* **13**, e0194509 (2018).
- 654 24. S. A. Shriner, *et al.*, SARS-CoV-2 exposure in escaped mink, Utah, USA. *Emerg. Infect.*  
655 *Dis.* **27**, 988–990 (2021).
- 656 25. B. D. Griffin, *et al.*, SARS-CoV-2 infection and transmission in the North American deer  
657 mouse. *Nat. Commun.* **12** (2021).
- 658 26. A. M. Bosco-Lauth, *et al.*, Survey of peridomestic mammal susceptibility to SARS-CoV-2  
659 infection. *bioRxiv*, 2021.01.21.427629 (2021).
- 660 27. , NationalDeerAssociation // DeerReport.
- 661 28. O. A. MacLean, *et al.*, Natural selection in the evolution of SARS-CoV-2 in bats created a  
662 generalist virus and highly capable human pathogen. *PLoS Biol.* **19** (2021).
- 663 29. Y. Liu, *et al.*, Delta spike P681R mutation enhances SARS-CoV-2 fitness over Alpha  
664 variant. *Cell Rep.* **39**, 110829 (2022).

- 665 30. T. J. Yang, *et al.*, Effect of SARS-CoV-2 B.1.1.7 mutations on spike protein structure and  
666 function. *Nat. Struct. Mol. Biol.* 2021 289 **28**, 731–739 (2021).
- 667 31. W. T. Harvey, *et al.*, SARS-CoV-2 variants, spike mutations and immune escape. *Nat.*  
668 *Rev. Microbiol.* 2021 197 **19**, 409–424 (2021).
- 669 32. nCoV-2019 sequencing protocol v2 (GunIt).
- 670 33. J. Hadfield, *et al.*, Nextstrain: real-time tracking of pathogen evolution. *Bioinformatics* **34**,  
671 4121–4123 (2018).
- 672 34. S. Argimón, *et al.*, Microreact: visualizing and sharing data for genomic epidemiology and  
673 phylogeography. *Microb. Genomics* **2**, e000093 (2016).
- 674 35. K. Katoh, D. M. Standley, MAFFT multiple sequence alignment software version 7:  
675 Improvements in performance and usability. *Mol. Biol. Evol.* **30**, 772–780 (2013).
- 676 36. G. Tsueng, *et al.*, Outbreak.info Research Library: A standardized, searchable platform to  
677 discover and explore COVID-19 resources. *bioRxiv Prepr. Serv. Biol.* (2022)  
678 <https://doi.org/10.1101/2022.01.20.477133>.
- 679 37. J. Crispell, D. Balaz, S. V. Gordon, Homoplasifyfinder: A simple tool to identify  
680 homoplasies on a phylogeny. *Microb. Genomics* **5**, e000245 (2019).
- 681 38. , Kulldorff M. and Information Management Services, Inc. SaTScan<sup>TM</sup> (2022).
- 682 39. H. D. Hedman, *et al.*, Spatial analysis of chronic wasting disease in free-ranging white-  
683 tailed deer (*Odocoileus virginianus*) in Illinois, 2008–2019. *Transbound. Emerg. Dis.* **68**,  
684 2376–2383 (2021).
- 685 40. , QGIS.Org, QGIS geographic information system (2022).
- 686

## Figure 1

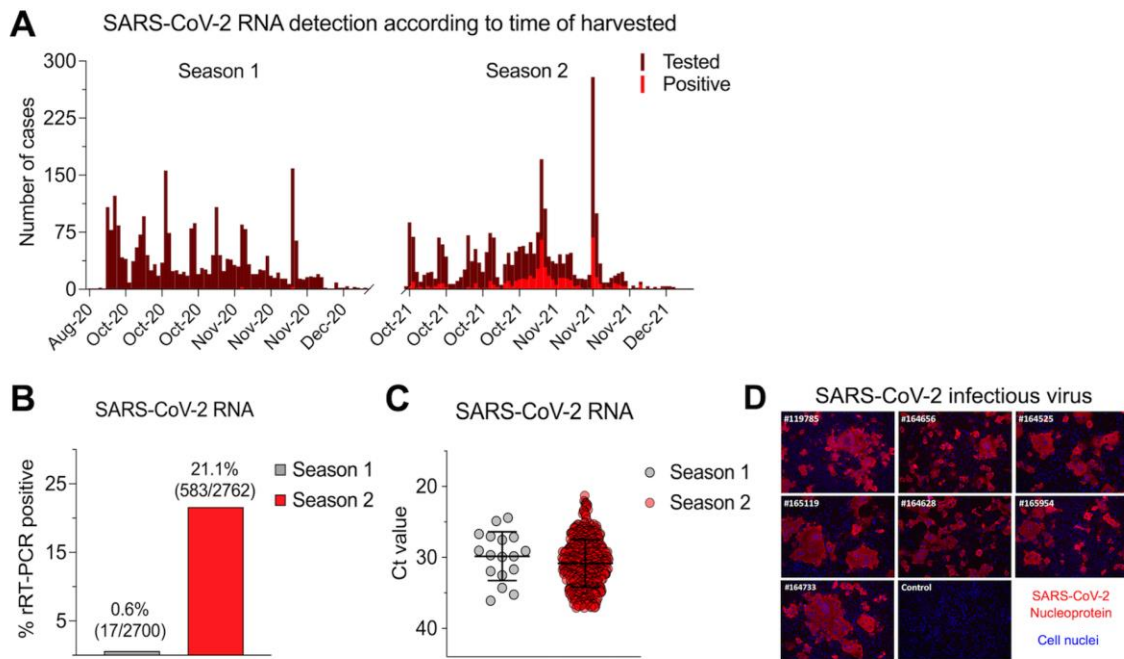

**FIG 1 Prevalence of SARS-CoV-2 infection in WTD in NY.** A total of 5,462 retropharyngeal lymph node (RPLN) samples were collected from free-ranging hunter-harvested white-tailed deer (WTD) during the hunting Seasons 1 (September - December 2020,  $n = 2,700$ ) and Season 2 (September - December 2021,  $n = 2,762$ ) in the State of New York (NY). (A) RPLN tested for the presence of SARS-CoV-2 viral RNA using real-time reverse transcriptase PCR (rRT-PCR). The number of samples tested and SARS-COV-2 positive samples in Season 1 and Season 2 is shown in the graphic. (B) Distribution of positive samples per season. Number of SARS-COV-2 RNA positive RPLN from WTD. (C) SARS-CoV-2 RNA detection by rRT-PCR presented as cycle threshold ( $C_t$ )s value. All the  $C_t$  values for positive samples from season 1 ( $n = 17$ ) and season 2 ( $n = 583$ ) are shown. (D) Infectious SARS-CoV-2 recovered from seven samples (sample #IDs are indicated in white). Virus isolation was confirmed by immunofluorescence assay using a monoclonal antibody anti-SARS-CoV-2-nucleoprotein (N) (red). Nuclear counterstain was performed with DAPI (blue). 20x magnification.



Figure 2

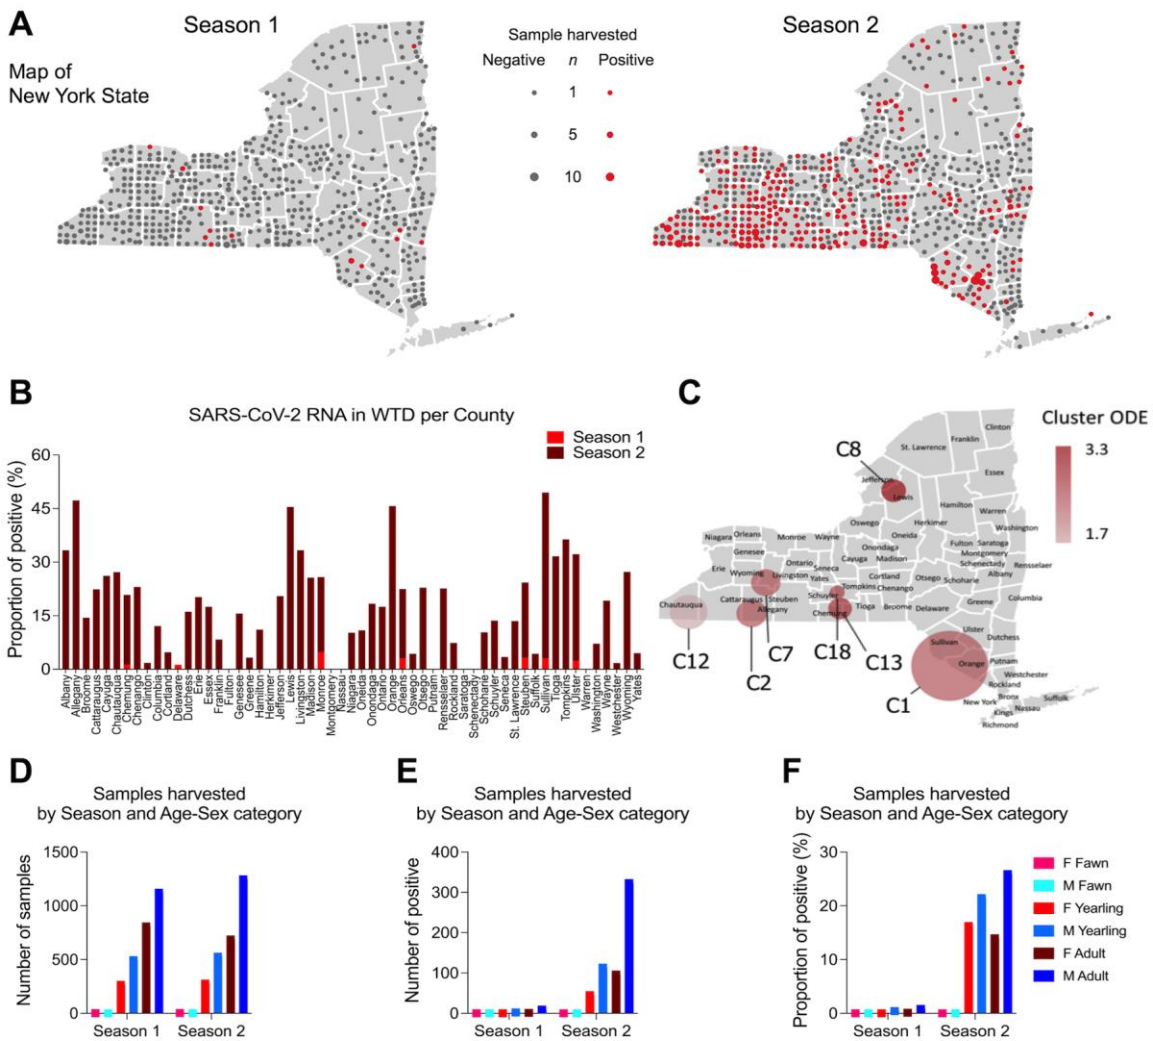

**FIG 2 Demographics of WTD population sampled and tested for SARS-CoV-2.** Retropharyngeal lymph node (RPLN) samples were collected from free-ranging hunter-harvested white-tailed deer (WTD) during the hunting Seasons 1 (September - December 2020,  $n = 2,700$ ) and Season 2 (September - December 2021,  $n = 2,762$ ) in the State of New York (NY). (A) Sampling distribution and positivity across the State of New York. SARS-CoV-2 RNA was detected in 17 samples (0.6%) from Season 1 and in 583 (21.1%) samples from Season 2. (B) Proportion of SARS-CoV-2 positive samples in Season 1 and Season 2. (C) High-risk areas or hotspots of SARS-CoV-2 infection in WTD in New York. Spatial cluster analysis performed with the samples from Season 2 ( $n = 2,762$ ). Nineteen spatial clusters (C1 - C19) containing from 3 to 57 positive samples collected within a radius of 10.6 to 55 kilometers (Km) from each other were identified. Seven hotspots with high-risk for SARS-CoV-2 infection in WTD (relative risk [RR] > 1.76) are highlighted in the map. (D) Total number of collected samples based on sex and age of WTD during Season 1 and Season 2. Animals were distributed in three age groups as follows: < 1.5 years old (fawns),  $\geq 1.5$  and < 2.5 years old (yearlings),  $\geq 2.5$  years old (adults). (E) Number of SARS-CoV-2 positive samples based on sex and age of WTD during Season 1 and Season 2. (F) Proportion of positive samples based on sex and age of WTD during Season 1 and Season 2.



Figure 3

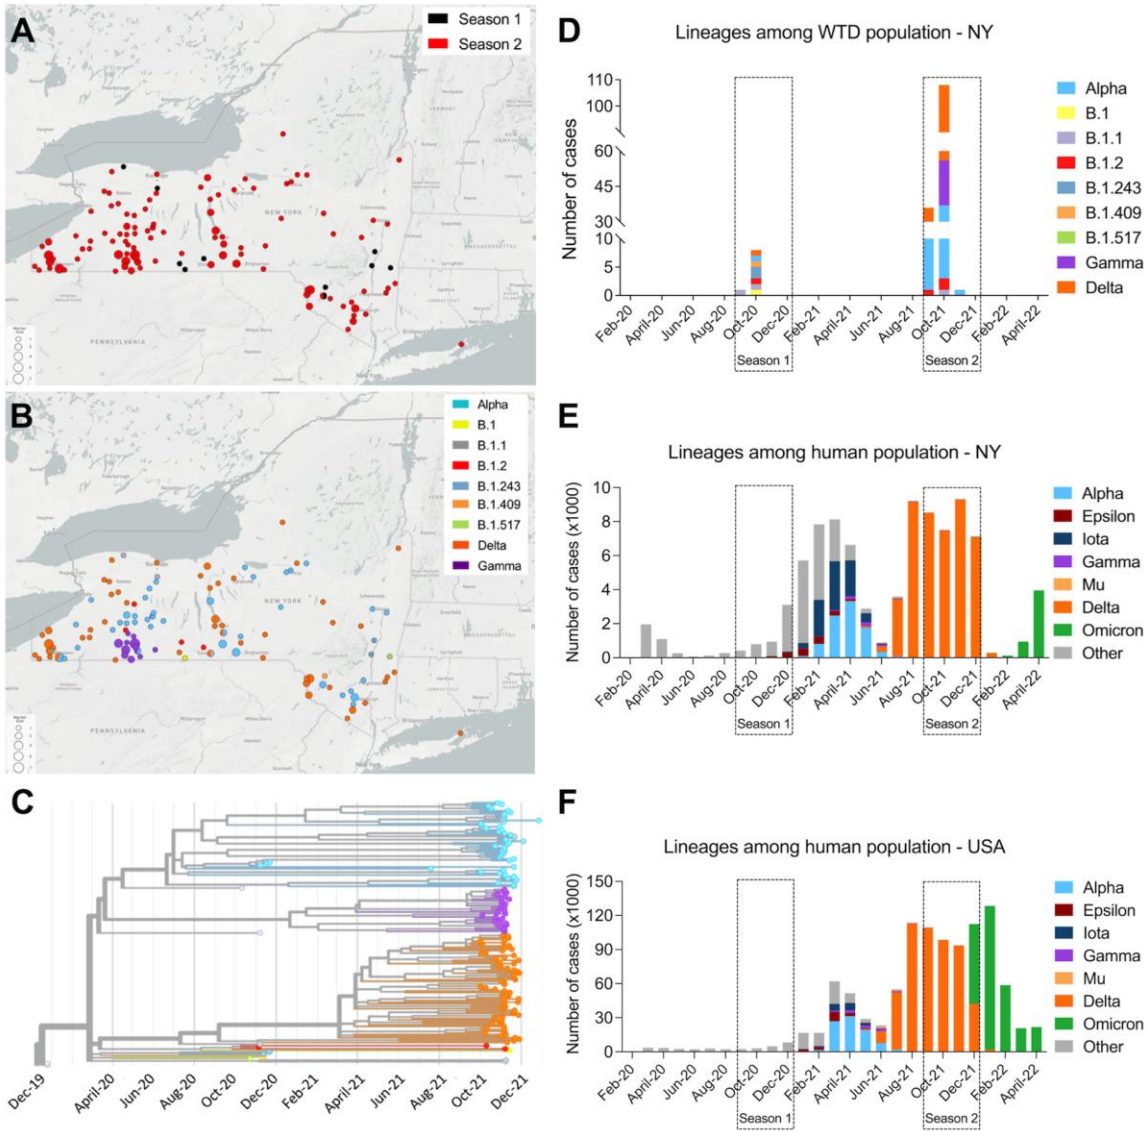

**FIG 3 Distribution of SARS-CoV-2 lineages across the State of New York (NY) and phylogenetic relatedness of viral genomes.** (A) Geographic distribution of the 164 samples from which complete or near complete SARS-CoV-2 genome sequences were obtained and according to the season is presented (9 and 155 genomes from Season 1 and Season 2, respectively). (B) Geographic distribution of the SARS-CoV-2 lineages detected in free-ranging white-tailed deer (WTD) in this study. (C) Distribution of SARS-CoV-2 lineages among WTD population in NY during Season 1 and Season 2. (D) Phylogenetic tree showing 164 SARS-CoV-2 genomes obtained from WTD in New York across time. (E) Monthly distribution of SARS-CoV-2 human cases (February 2020 to May 2022) from NY and (F) United States of America (US). The colored stacked bars represent proportion of each SARS-CoV-2 lineages.

Figure 4

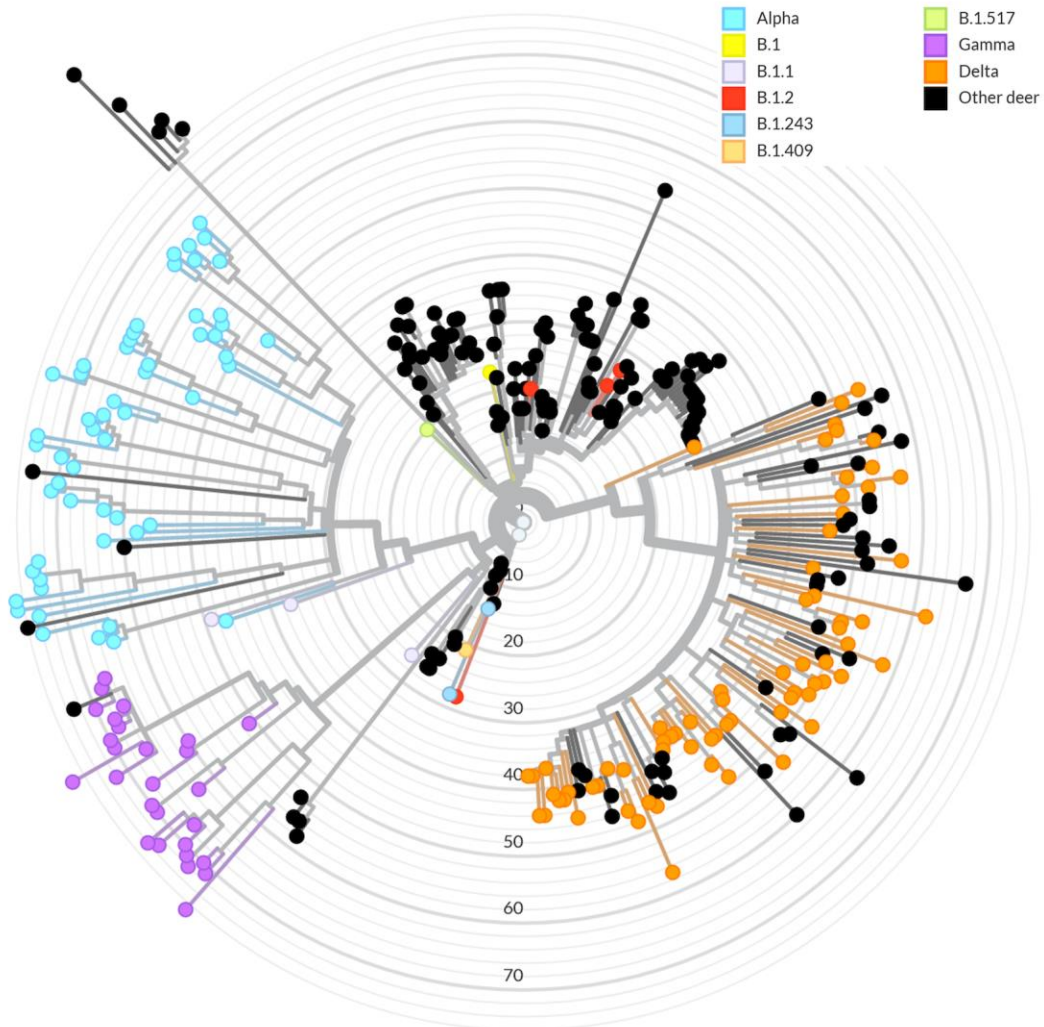

**FIG 4 Phylogenomic analysis of SARS-CoV-2 derived from WTD.** Phylogeny of 164 SARS-CoV-2 sequences derived from white-tail deer (WTD) in the State of New York during Season 1 and Season 2 in context of 159 SARS-CoV-2 sequences derived from WTD available in GISAID. The node colors (sky blue: Alpha; purple: Gamma and orange: Delta) represent SARS-CoV2 variants of concern (VOCs) derived from WTD sequences from this study and the black nodes represent the Pan-US SARS-CoV-2 sequences derived from WTD.

## Figure 5

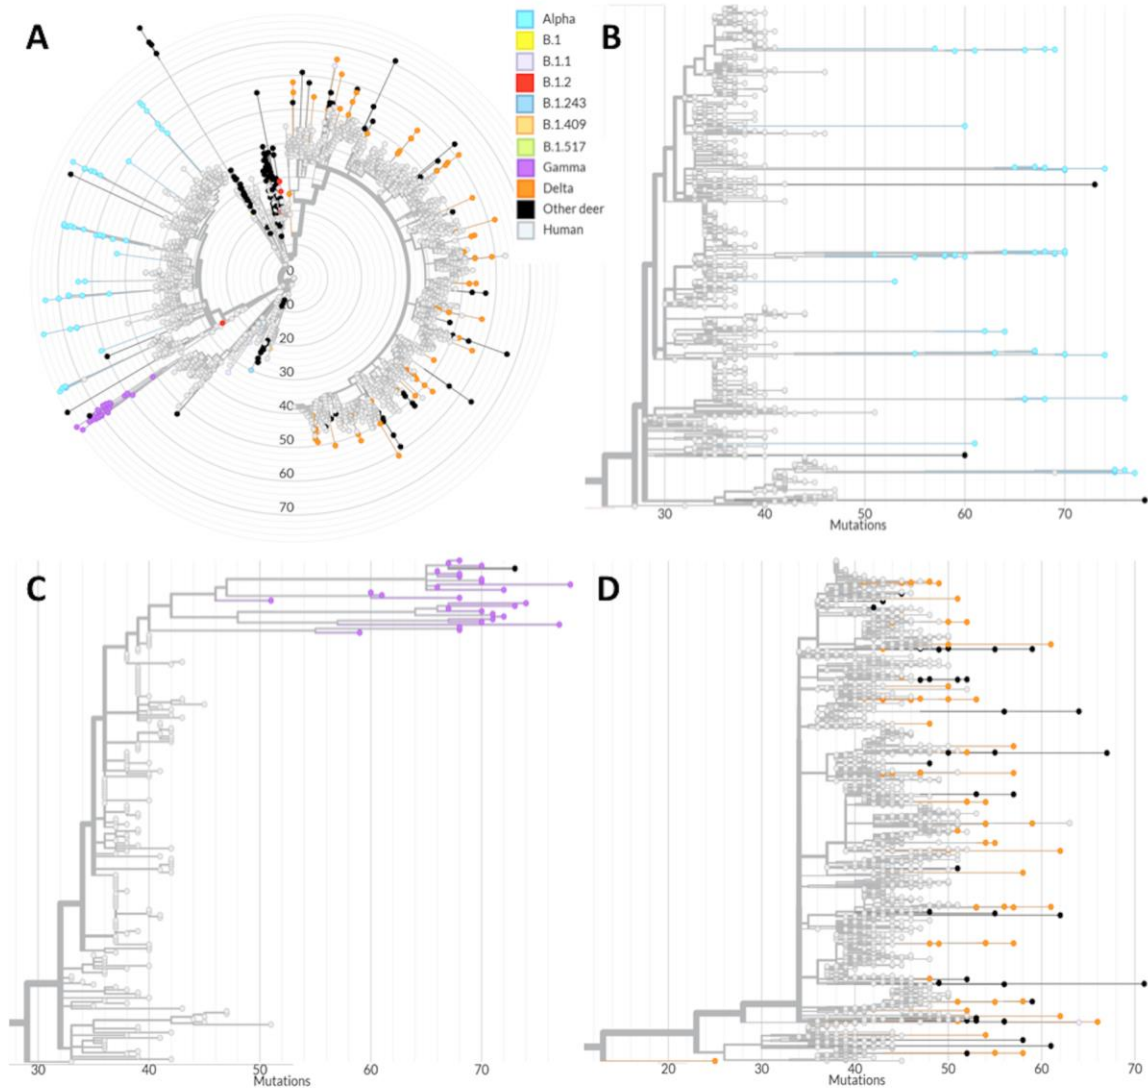

**FIG 5 Phylogenomic analysis of SARS-CoV-2 derived from humans and WTD.** Divergence between white-tailed deer (WTD) and human derived SARS-CoV-2 sequences. The node colors (sky blue: Alpha; purple: Gamma and orange: Delta) represent SARS-CoV2 variants of concern (VOCs) derived from WTD from this study, black nodes represent the Pan-US SARS-CoV-2 sequences derived from WTD and grey nodes represent SARS-CoV-2 sequences derived from human. The X axis shows the number of mutations compared to the reference sequence Wuhan-1 (GenBank accession number MN908947.3). (A) Phylogenetic tree comprising 164 WTD derived sequences and 3837 human derived sequences. Magnification of the Alpha (B), Gamma (C), and Delta (D) clusters.

Figure 6

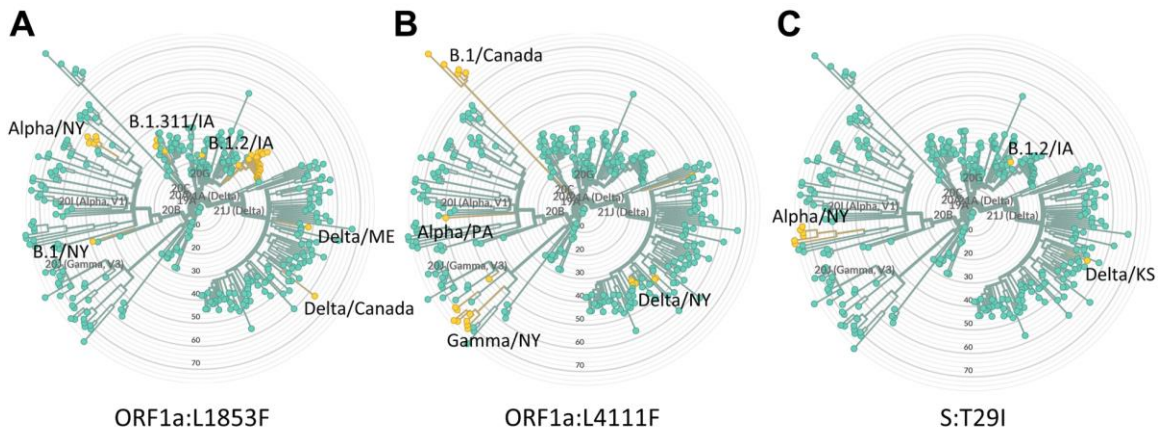

**FIG 6 Potential host-adaptive mutations detected in WTD SARS-CoV-2 samples.** Mutations highlighted were selected by homoplasy consistency index, prevalence in white-tailed deer derived sequences and detection in multiple geographical regions. Yellow nodes represent sequences with the mutation and green nodes represent the original amino acid. The subclades or nodes where the potential host-adaptive mutations were detected are identified with labels describing the lineage and the state where the samples were collected. (A) Mutation ORF1a:L1853F, (B) mutation ORF1a:L4111F and (C) mutation S:T29I.



Figure 7

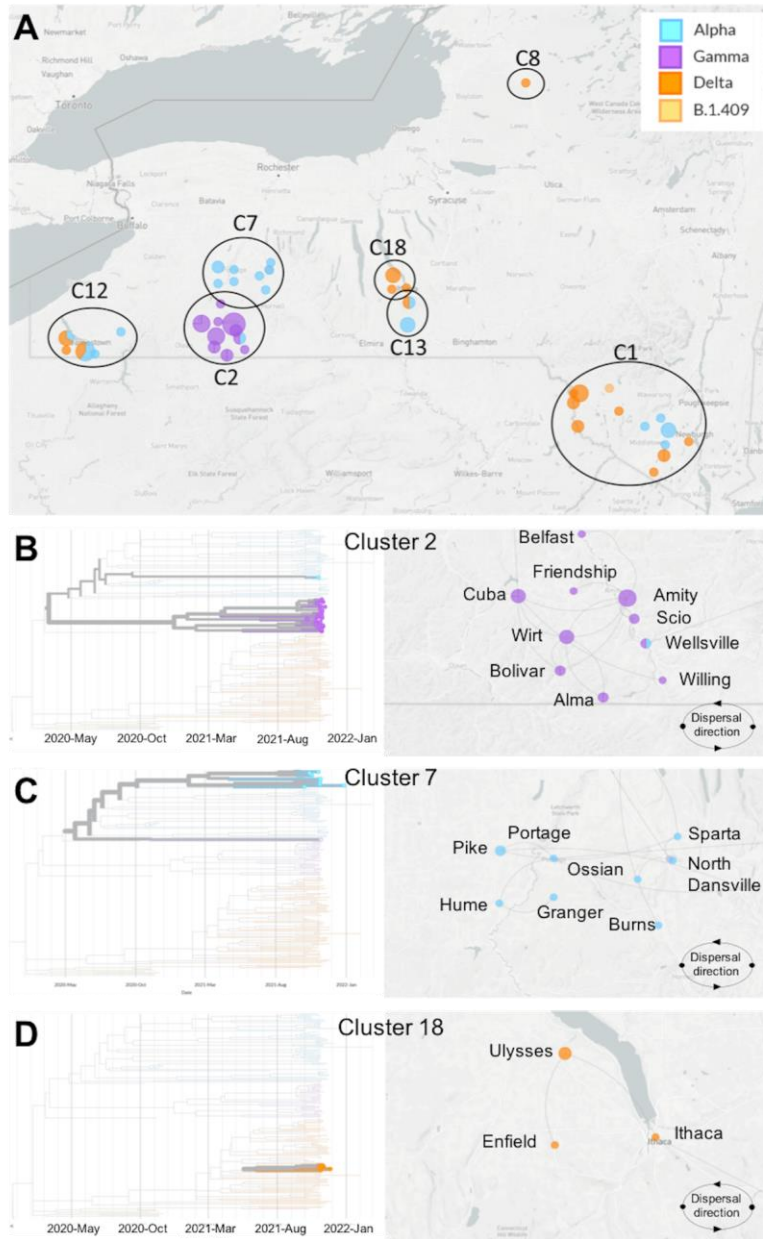

**FIG 7 Dispersal of SARS-CoV-2 within hotspots of infection in white-tailed deer in the State of New York (NY).** (A) Sampling location and lineage classification of sequences obtained within the seven high-risk clusters in NY. Clusters are identified as C1, C2, C7, C8, C12, C13 and C18. Phylogenetic reconstruction and dispersal analysis of (B) cluster C2, (C) cluster C7 and (D) cluster C18. Directions of dispersal lines are counter-clockwise.

## Figure 8

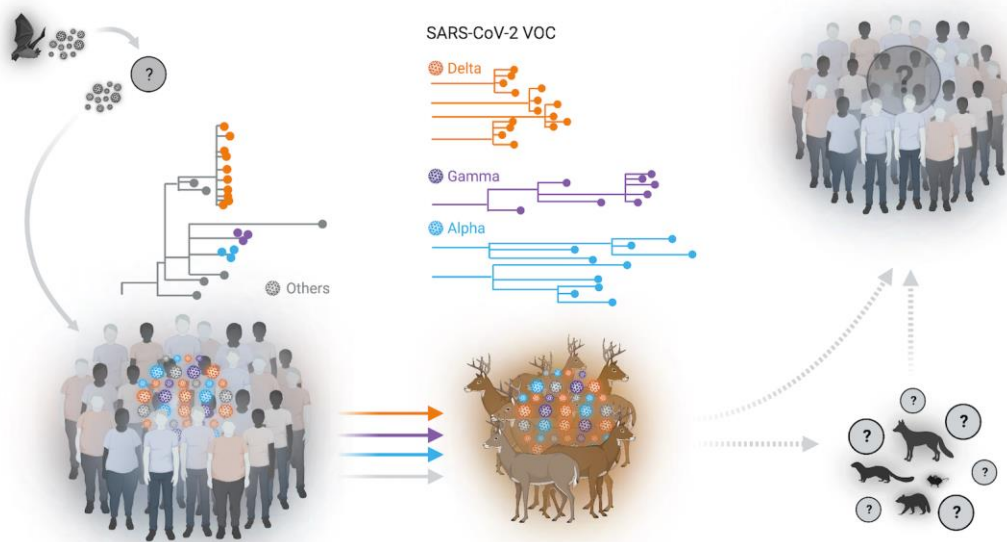

**FIG 8 Spillover of SARS-CoV-2 from humans to white-tailed deer.** Multiple spillover events of SARS-CoV-2 from humans to wild white-tailed deer (WTD) population were identified in several geographic areas in the State of New York (NY). Sequence analysis of SARS-CoV-2 genomes demonstrated the circulation of classical SARS-CoV-2 lineages as well as the co-circulation of three major variants of concern (VOCs) (Alpha, Gamma, and Delta) in WTD. Our analysis suggests the occurrence of multiple spillover events (human-to-deer) of multiple SARS-CoV-2 lineages with subsequent deer-to-deer transmission and emergence of highly genetically diverse viruses in this species. The potential for spillback of variant SARS-CoV-2 to humans or yet spillover from WTD to other susceptible wildlife species (e.g. mink, deer mice, raccoon dogs, and red fox) remains unknown.
